# Supplementary material for: Exercise and epigenetic ages in older adults with myeloid malignancies
Source: Springer Nature journal article supplement (doi:10.1186/s40001-023-01145-z), 2023-05-30

A)

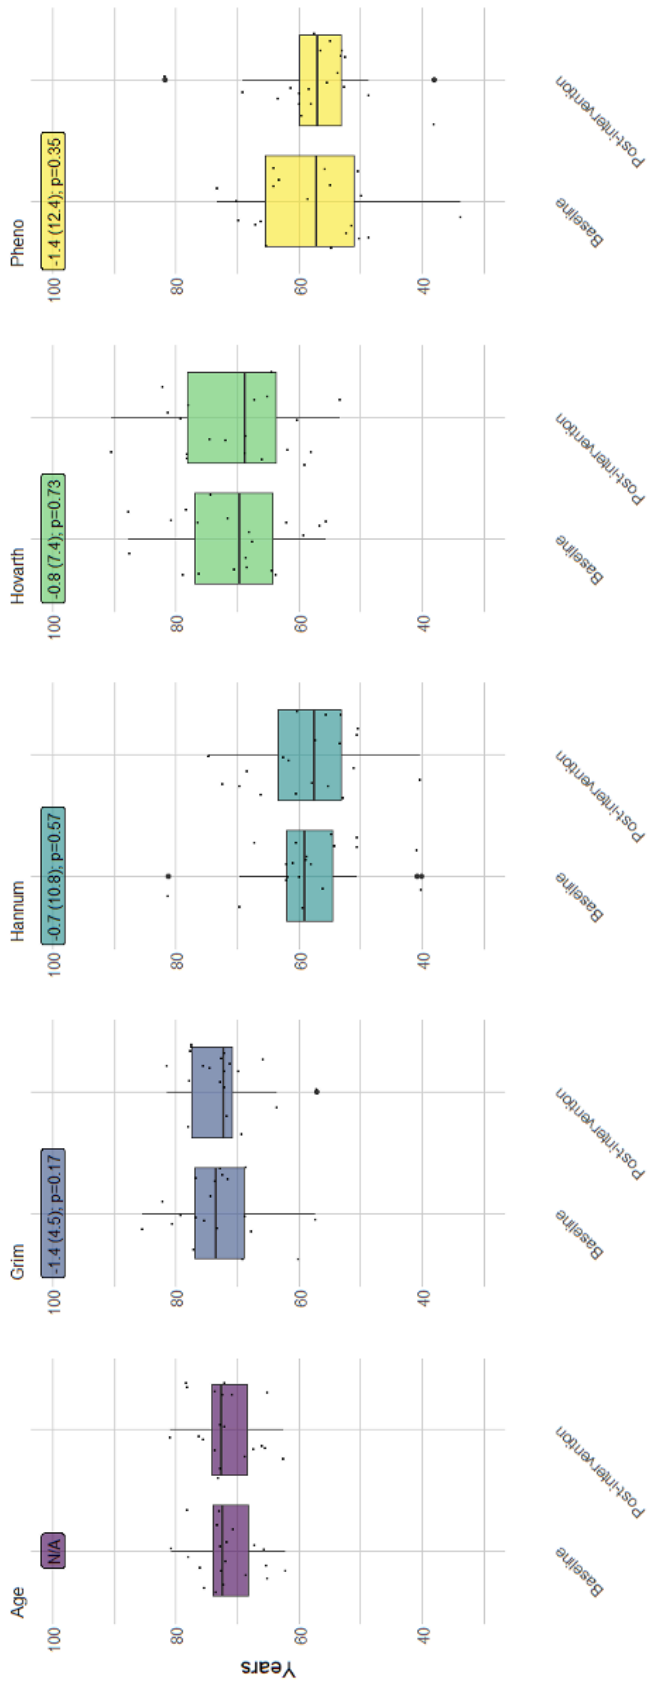

B)

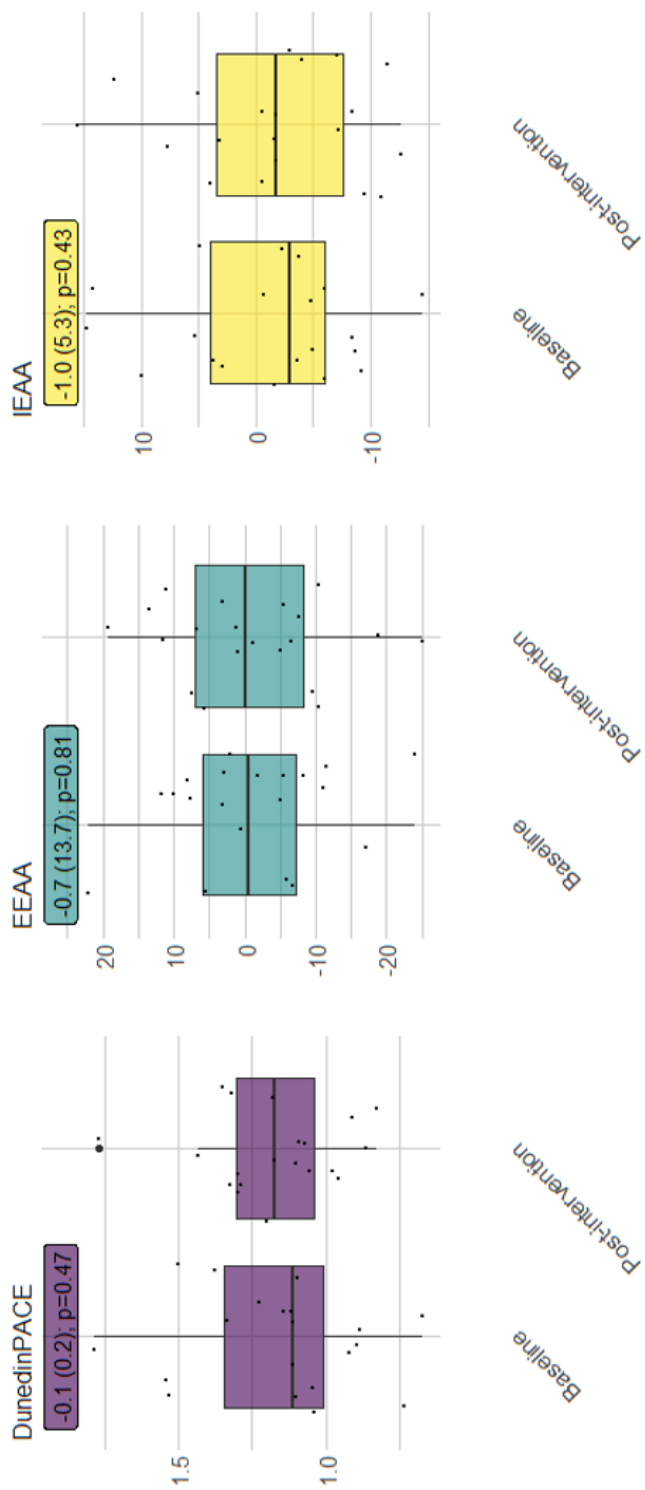

Supplement: MOESM1 [file 25423688]
